# Supplementary material
Source: Springer Nature journal article supplement (https://www.springermedizin.de/resource/supplementary/12913_2012_2261_MOESM1_ESM.pdf/9530078)
Supplement: MOESM1 [file 9530078]

## **Work Life/Home Life Dimension**

- Family and family needs
- Energy after work
- Working hours/shifts
- Policy for vacations

## **Work Design Dimension**

- Job satisfaction
- Workload
- Autonomy
- Non-nursing tasks
- Interruptions
- Time to do jobs
- Workforce (Staffing)
- Patient care

## **Work Context Dimension**

- Management
- Co-workers
- Growth opportunities
- Work environment

## **Work World Dimension**

- Image of nursing
- Payment
- Labour market
- Security of Job
- Belief in nursing

## **Quality of Work Life Level**

## **Turnover Intention**

## **Demographics**

- Gender
- Age
- Marital status
- Dependent children
- Dependent adults
- Nationality
- Ethnicity
- Education level
- Nursing tenure
- Organisational tenure
- Positional tenure
- Location of PHC
- Salary per month
